# Supplementary material for: Ag and N-doped carbon dot-enhanced H2O2–Co2+ chemiluminescence and its application for the determination of Co2+ and hydroquinone
Source: Royal Society of Chemistry journal article supplement (doi:10.1039/d3nj04632j), 2023-01-01
Supplement: d3nj04632j1.pdf [file d3nj04632j1.pdf]

## Supplementary Material

Ag and N-doped carbon dots-enhanced  $\text{H}_2\text{O}_2$ - $\text{Co}^{2+}$  chemiluminescence  
and its application for the determination of  $\text{Co}^{2+}$  and hydroquinone†

Xiaowei Wang, Zixuan Wang, Yamei Jiang, Suqin Han\*

School of Chemistry and Material Science, Shanxi Normal University, Taiyuan  
030000, Shanxi, P. R. China

---

\* Corresponding author at: School of Chemistry and Material Science, Shanxi Normal  
University, Taiyuan 030000, Shanxi, P. R. China

E-mail address: [hsq@sxnu.edu.cn](mailto:hsq@sxnu.edu.cn)

† Electronic supplementary information (ESI) available.

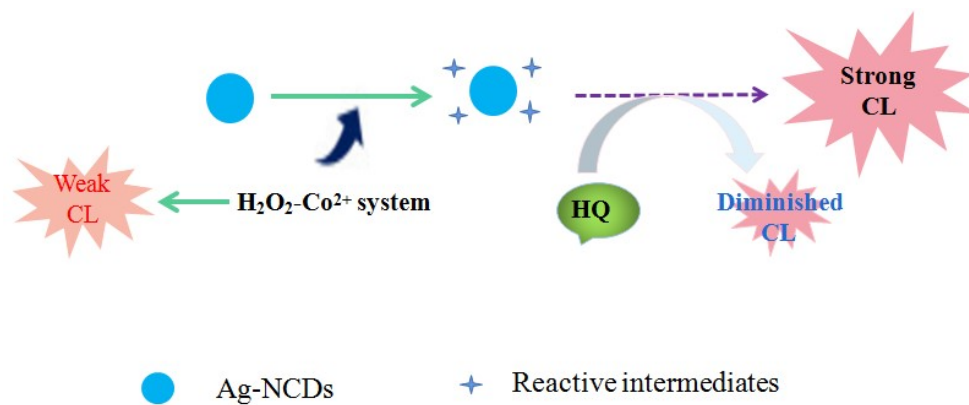

**Scheme S1** Schematic illustration of the Ag-NCDs amplified Fenton-like CL emissions.

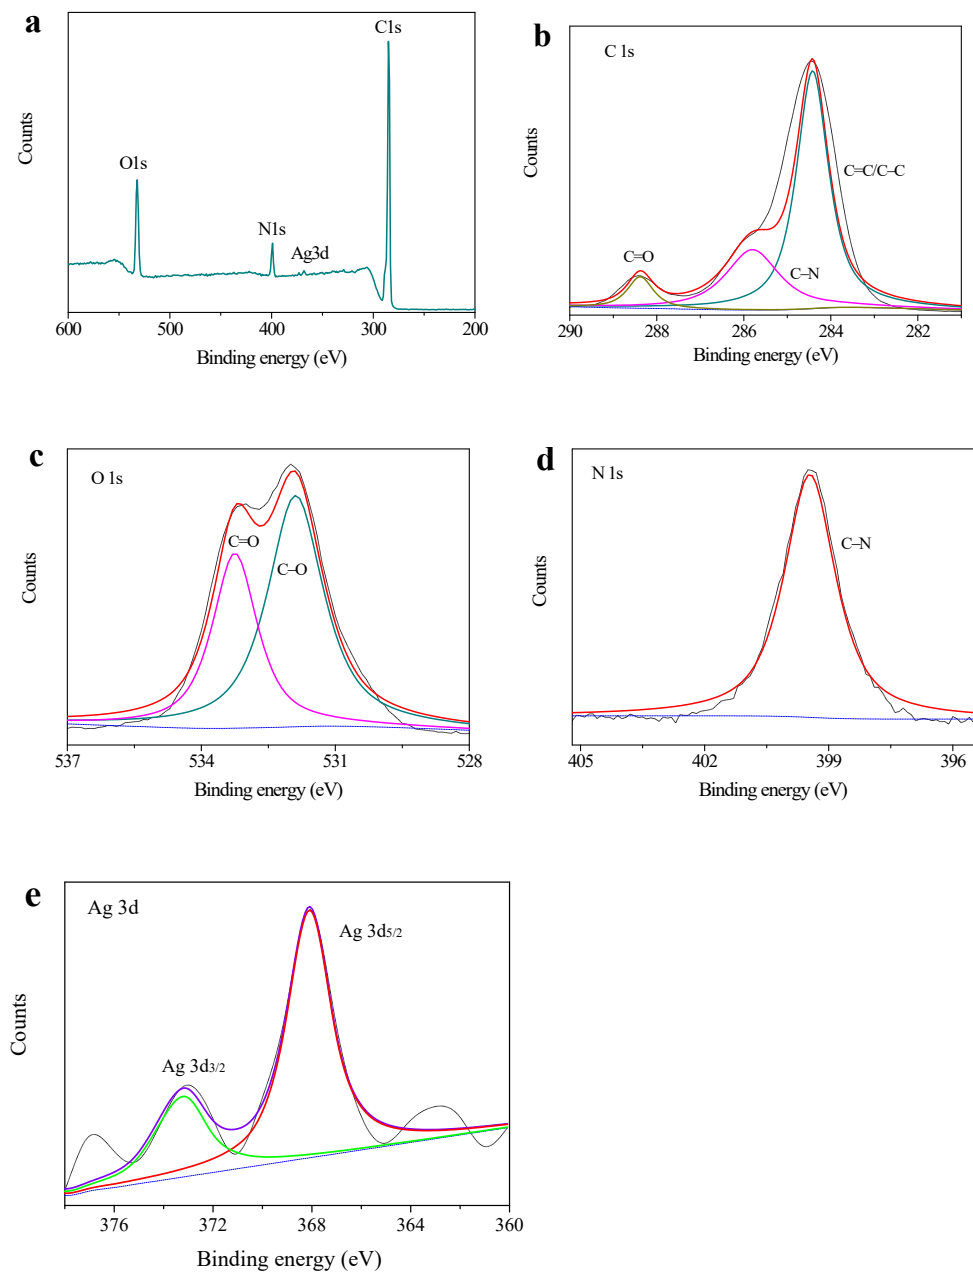

**Fig. S1** XPS spectrum of Ag-NCDs (a) and high resolution XPS spectra of Ag-NCDs: (b) C 1s, (c) O 1s, (d) N 1s and (e) Ag 3d.

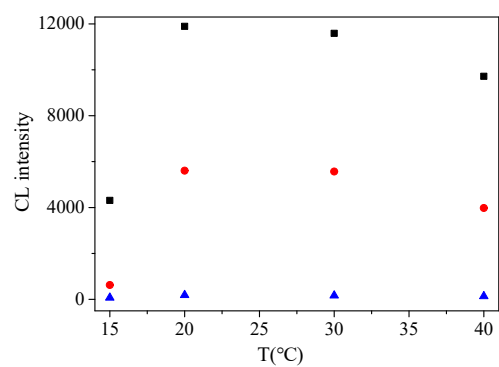

**Fig. S2** The effect of reaction cell temperature on CL intensity: Ag-NCDs-H<sub>2</sub>O<sub>2</sub> (blue), Ag-NCDs-H<sub>2</sub>O<sub>2</sub>-Co<sup>2+</sup> (black), and Ag-NCDs-H<sub>2</sub>O<sub>2</sub>-Co<sup>2+</sup>-HQ (red).

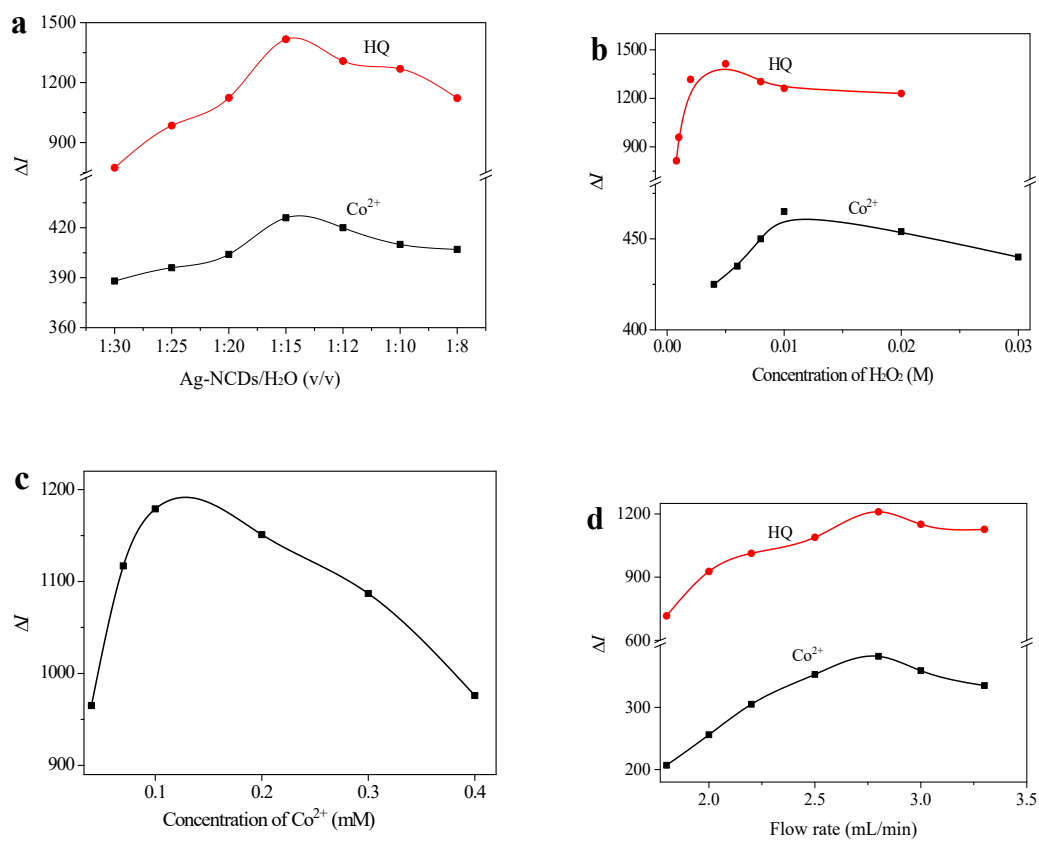

**Fig. S3** Optimization of CL reaction conditions. **(a)** Ag-NCDs concentration; **(b)** H<sub>2</sub>O<sub>2</sub> concentration; **(c)** Co<sup>2+</sup> concentration; **(d)** flow rate.

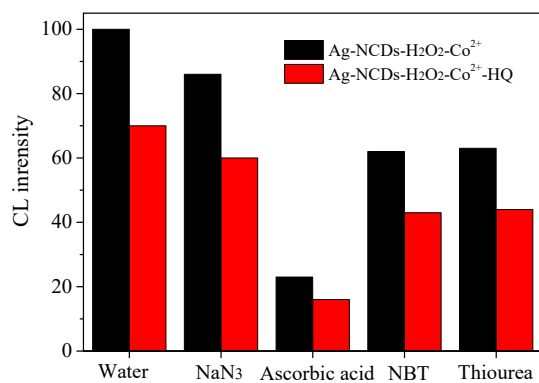

**Fig. S4** Effect of radical scavengers (1.0 mM concentration) on the CL intensity.

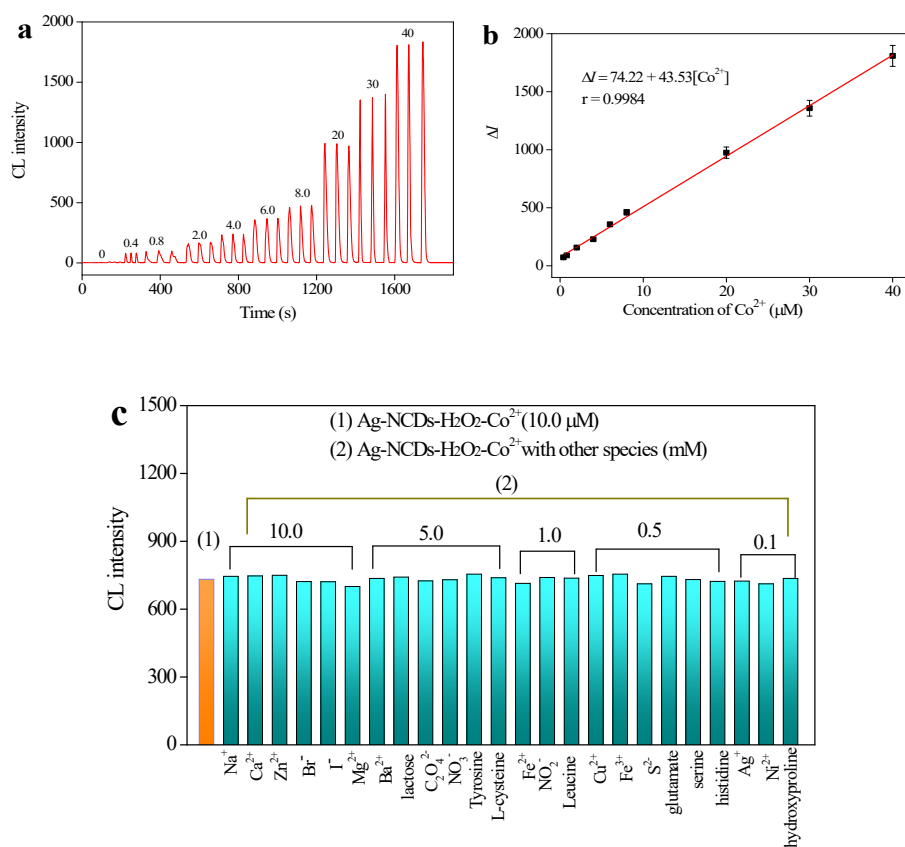

**Fig. S5** (a) CL intensity of the Ag-NCDs-H<sub>2</sub>O<sub>2</sub> system upon addition of different concentrations ( $\mu\text{M}$ ) of  $\text{Co}^{2+}$ ; (b) corresponding calibration curve for the  $\text{Co}^{2+}$  assay; (c) Influence of various concentrations other species on the CL intensity of Ag-NCDs-H<sub>2</sub>O<sub>2</sub>- $\text{Co}^{2+}$  system.

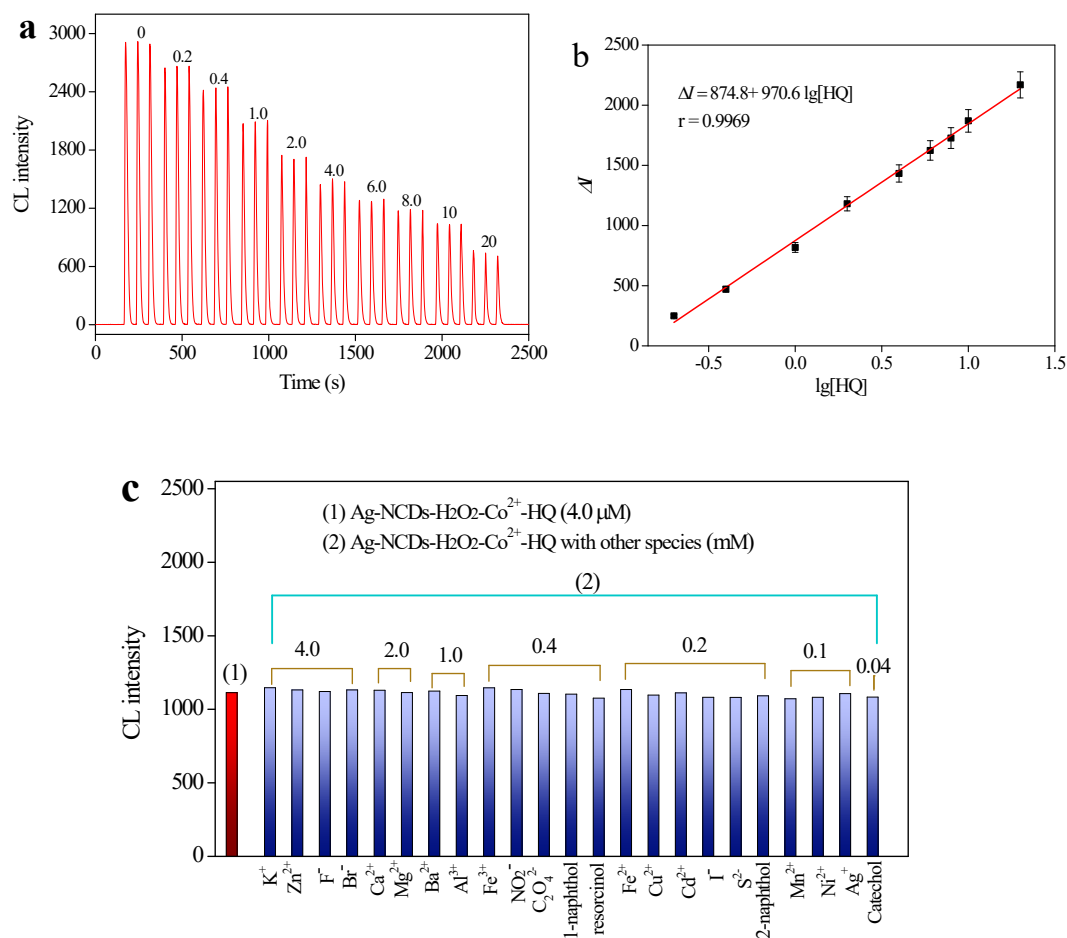

**Fig. S6** (a) CL intensity of Ag-NCDs-Co<sup>2+</sup>-H<sub>2</sub>O<sub>2</sub> system at different concentrations (μM) of HQ; (b) corresponding calibration for HQ determination; (c) Effect of different ions at 0.1–4.0 mM and phenols at 0.04–0.4 mM on the CL of the Ag-NCDs-Co<sup>2+</sup>-H<sub>2</sub>O<sub>2</sub>-HQ system.



**Table S1** Comparison of the proposed Co<sup>2+</sup> detection method with other methods

| Methods | Systems                                                 | Linear range<br>( $\mu\text{M}$ ) | Detection limit<br>( $\mu\text{M}$ ) | References |
|---------|---------------------------------------------------------|-----------------------------------|--------------------------------------|------------|
| FAAS    | SS-LPME-SQT                                             | 3.40–33.96                        | 1.27                                 | 5          |
| UV-vis  | AgNPs                                                   | 1.7–20                            | 0.68                                 | 6          |
| FL      | $\beta$ -CD@ZnO QDs                                     | 1.0–10                            | 0.34                                 | 9          |
| FL      | Polymer dots                                            | 3.4–50                            | 1.0                                  | 10         |
| CL      | Luminol-DBF                                             | 0.005–1.0                         | 0.018                                | 13         |
| CL      | NBS-rCDs(OH <sup>-</sup> )                              | 0.1–1000                          | 3.25                                 | 14         |
| CL      | Ag-NCDs-Co <sup>2+</sup> -H <sub>2</sub> O <sub>2</sub> | 0.4–40                            | 0.07                                 | This work  |

**Table S2** Determination results of Co<sup>2+</sup> and HQ in real samples

| Analyst          | Sample      | Added ( $\mu\text{M}$ ) | Founded ( $\mu\text{M}$ ) | RSD (%) | Recovery (%) |
|------------------|-------------|-------------------------|---------------------------|---------|--------------|
| Co <sup>2+</sup> | Egg yolk    | 0                       | Not found                 |         |              |
|                  |             | 4.0                     | 3.98                      | 0.33    | 99.5         |
|                  |             | 6.0                     | 6.06                      | 1.65    | 101.0        |
|                  | vitamin B12 | 0                       | 2.02                      | 1.98    |              |
|                  |             | 4.0                     | 6.00                      | 0.58    | 99.5         |
|                  |             | 6.0                     | 8.14                      | 0.45    | 102.0        |
| HQ               | Tap water   | 0                       | Not found                 |         |              |
|                  |             | 2.0                     | 2.01                      | 0.85    | 100.5        |
|                  |             | 4.0                     | 3.87                      | 1.09    | 96.8         |
|                  | Lake water  | 0                       | Not found                 |         |              |
|                  |             | 2.0                     | 2.07                      | 0.96    | 103.5        |
|                  |             | 4.0                     | 3.94                      | 1.14    | 98.5         |

**Table S3** Comparison of the proposed HQ detection method with other methods

| Methods | Systems                                            | Linear range<br>( $\mu\text{M}$ ) | Detection limit<br>( $\mu\text{M}$ ) | References |
|---------|----------------------------------------------------|-----------------------------------|--------------------------------------|------------|
| UV-vis  | $\text{KMnO}_4$                                    | 0.64–18.17                        | 0.191                                | 7          |
| UV-vis  | $\text{NH}_4\text{VO}_3\text{-O}_2$                | 0.23–18.17                        | 0.064                                | 8          |
| FL      | g-CNQDs                                            | 0.5–11.6                          | 0.04                                 | 11         |
| FL      | N/S/P-CDs                                          | 0.56–375                          | 0.16                                 | 12         |
| CL      | GQDs- $\text{KMnO}_4$                              | 9.05–2261.58                      | 0.77                                 | 15         |
| ED      | COF/CPE                                            | 1–400                             | 0.64                                 | 16         |
| ED      | OM- $\text{MnFeO}_x$ /GCE                          | 1–2000                            | 0.31                                 | 17         |
| CL      | Ag-NCDs- $\text{Co}^{2+}$ - $\text{H}_2\text{O}_2$ | 0.2–20                            | 0.04                                 | This work  |
